# Supplementary material for: Safety and efficacy of Vitamin D 3 supplementation with Imatinib in Chronic Phase- Chronic Myeloid Leukaemia: an Exploratory Randomized Controlled Trial
Source: HighWire-hosted journal article supplement (doi:10.1136/bmjopen-2022-066361), 2023-08-01

**Supplemental Figure 1: Time to event analysis of complete hematologic response in treatment groups**

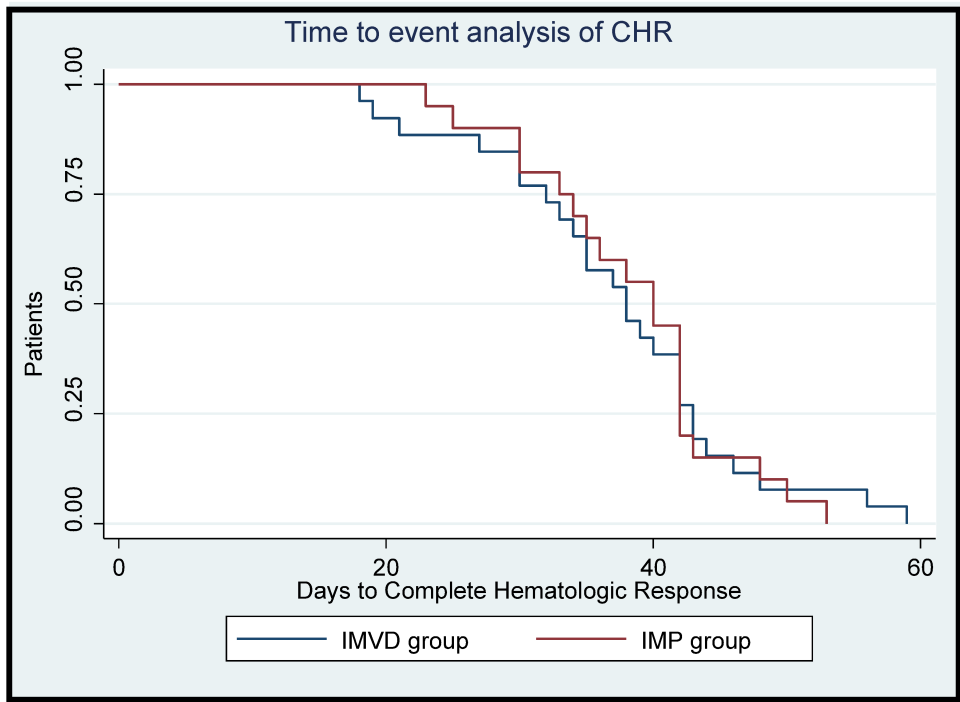

Supplement: bmjopen-2022-066361supp001_data_supplement.pdf [file bmjopen-2022-066361supp001_data_supplement.pdf]
